# Supplementary material for: Cardiorespiratory Fitness, Fat Mass, and Cardiometabolic Health with Endothelial Function, Arterial Elasticity, and Stiffness
Source: PubMed Central journal article supplement — Med Sci Sports Exerc. 2021 Aug 16;54(1):141–52. doi: 10.1249/MSS.0000000000002757 (PMC8677603; doi:10.1249/mss.0000000000002757), 2021-08-16
Supplement: msse-54-141-s002.pdf [file msse-54-141-s002.pdf]

**Table SDC 1** Characteristics of participants excluded from the study

| Variables                                                       | Included participants |      | Excluded participants |      | P for difference | Cohen's D |
|-----------------------------------------------------------------|-----------------------|------|-----------------------|------|------------------|-----------|
|                                                                 | Mean (SD)             | n    | Mean/SD               | n    |                  |           |
| *Age (years)                                                    | 9.75 (0.33)           | 5566 | 9.83 (0.42)           | 2140 | < <b>0.0001</b>  | 0.24      |
| Somatic maturation (puberty) by time to aPHV (n, %)             | 22 (0.5)              | 4203 | 15 (0.01)             | 1189 | <b>0.015</b>     | NA        |
| <b>Social-economic status based on Mother's occupation</b>      |                       |      |                       |      |                  |           |
| I – Professional (%)                                            | 5.1                   | 127  | 4.4                   | 36   | 0.091            | NA        |
| II - Managerial and Technical (%)                               | 36.3                  | 910  | 36.7                  | 304  |                  |           |
| IIIa - Skilled non-manual (%)                                   | 39.1                  | 981  | 36.1                  | 299  |                  |           |
| IIIb - Skilled manual (%)                                       | 1.7                   | 43   | 2.2                   | 18   |                  |           |
| IV - Partly skilled (%)                                         | 14.7                  | 370  | 16.3                  | 135  |                  |           |
| V - Unskilled (%)                                               | 3.1                   | 78   | 4.3                   | 36   |                  |           |
| <b>Anthropometry and Fat measure</b>                            |                       |      |                       |      |                  |           |
| Body height (m)                                                 | 1.40 (0.06)           | 5510 | 1.40 (0.07)           | 2120 | 0.059            | 0         |
| *Weight (kg)                                                    | 33.0 (8.6)            | 5555 | 33.60 (10.0)          | 2134 | < <b>0.0001</b>  | 0.13      |
| *Body mass index (kg/m <sup>2</sup> )                           | 16.95 (3.32)          | 5506 | 17.21 (3.69)          | 2119 | < <b>0.0001</b>  | 0.14      |
| Lean mass (kg)                                                  | 24.52 (3.19)          | 5304 | 24.71 (3.35)          | 2016 | <b>0.026</b>     | 0.06      |
| Lean mass indexed for squared height (kg/m <sup>2</sup> )       | 12.56 (0.99)          | 5255 | 12.60 (1.02)          | 2000 | 0.197            | NA        |
| *Total fat mass (kg)                                            | 7.14 (6.06)           | 5304 | 7.49 (7.0)            | 2016 | < <b>0.0001</b>  | 0.14      |
| *Total fat mass indexed for squared height (kg/m <sup>2</sup> ) | 3.67 (2.94)           | 5255 | 3.87 (3.38)           | 2000 | < <b>0.0001</b>  | 0.13      |
| *Trunk fat mass (kg)                                            | 2.65 (2.68)           | 5304 | 2.81 (3.24)           | 2016 | < <b>0.0001</b>  | 0.14      |
| *Trunk fat mass indexed for squared height (kg/m <sup>2</sup> ) | 1.37 (1.34)           | 5255 | 1.46 (1.56)           | 2000 | < <b>0.0001</b>  | 0.14      |
| <b>Metabolic profile</b>                                        |                       |      |                       |      |                  |           |
| High-density lipoprotein (mmol/L)                               | 1.40 (0.31)           | 3769 | 1.40 (0.31)           | 1307 | 0.945            | NA        |
| Low-density lipoprotein (mmol/L)                                | 2.35 (0.60)           | 3769 | 2.34 (0.62)           | 1307 | 0.494            | NA        |
| *Triglyceride (mmol/L)                                          | 1.00 (0.60)           | 3769 | 1.01 (0.64)           | 1307 | 0.934            | NA        |
| *Adiponectin (µg/ml)                                            | 12.35 (7.02)          | 3767 | 12.43 (7.30)          | 1306 | 0.718            | NA        |
| <b>Fitness measure</b>                                          |                       |      |                       |      |                  |           |
| CRF (W)                                                         | 63.92 (9.07)          | 2813 | 64.44 (9.15)          | 1034 | 0.125            | NA        |
| CRF/BM (W·kg BM <sup>-1</sup> )                                 | 1.92 (0.38)           | 2810 | 1.90 (0.42)           | 1031 | 0.166            | NA        |
| CRF/BM <sup>-0.21</sup> (W·kg BM <sup>-0.21</sup> )             | 31.31 (4.31)          | 2810 | 31.42 (4.39)          | 1031 | 0.489            | NA        |
| CRF/LM <sup>-0.54</sup> (W·kg LM <sup>-0.54</sup> )             | 11.51 (1.46)          | 2683 | 11.51 (1.47)          | 982  | 0.870            | NA        |
| <b>Vascular measure</b>                                         |                       |      |                       |      |                  |           |
| Pulse rate (beats/min)                                          | 79 (11)               | 5512 | 79 (11)               | 2081 | 0.107            | NA        |
| Systolic blood pressure (mmHg)                                  | 103 (9)               | 5511 | 103 (10)              | 2080 | < <b>0.0001</b>  | 0.10      |
| Diastolic blood pressure (mmHg)                                 | 57 (6)                | 5512 | 58 (7)                | 2082 | <b>0.002</b>     | 0.15      |
| Brachial artery diameter (mm)                                   | 2.67 (0.30)           | 5566 | 2.69 (0.32)           | 555  | 0.083            | NA        |
| Flow-mediated dilation (%)                                      | 8.07 (3.37)           | 5566 | 7.93 (3.17)           | 555  | 0.368            | NA        |
| Flow-mediated dilation absolute (mm)                            | 0.21 (0.08)           | 5566 | 0.21 (0.08)           | 555  | 0.653            | NA        |
| Carotid-radial PWV (m/s)                                        | 7.54 (1.22)           | 5566 | 7.48 (1.18)           | 1042 | 0.106            | NA        |
| *Distensibility coefficient (% per mmHg)                        | 11.51 (6.91)          | 5566 | 11.57 (6.88)          | 733  | 0.268            | NA        |

The values are means (standard deviations) and \*median (interquartile range) except for maturation status and social economic status in percentage. Differences between participants were tested using Student's t-test for normally distributed continuous variables, Mann–Whitney U test for skewed continuous variables, Chi-square test for dichotomous variable, and one-way analysis of variance for multi-categorical variable. A 2-sided P-value <0.05 is considered statistically significant. Cohen's D effect size was calculated for statistically significant differences.

aPHV, age at peak height velocity; BM, body mass; CRF, cardiorespiratory fitness; LM, lean mass; NA, not applicable; PWV, pulse wave velocity; W, watt.
