# Supplementary material for: Cardiorespiratory Fitness, Fat Mass, and Cardiometabolic Health with Endothelial Function, Arterial Elasticity, and Stiffness
Source: PubMed Central journal article supplement — Med Sci Sports Exerc. 2021 Aug 16;54(1):141–52. doi: 10.1249/MSS.0000000000002757 (PMC8677603; doi:10.1249/mss.0000000000002757), 2021-08-16
Supplement: msse-54-141-s003.pdf [file msse-54-141-s003.pdf]

**Table SDC 2** Listwise exclusion of missing data among study participants

| <b>Variable</b>                                                | <b>n (valid sample size)</b> | <b>Eligible sample size</b> | <b>% Missing</b> |
|----------------------------------------------------------------|------------------------------|-----------------------------|------------------|
| Somatic maturation (puberty) by time to aPHV (%)               | 4203                         | 5566                        | 24.5             |
| Social-economic status based on Mother's occupation            | 2509                         | 5566                        | 54.9             |
| <b><i>Anthropometry and Fat measure</i></b>                    |                              |                             |                  |
| Body height (m)                                                | 5510                         | 5566                        | 1.0              |
| Weight (kg)                                                    | 5555                         | 5566                        | 0.2              |
| Lean mass (kg)                                                 | 5304                         | 5566                        | 4.7              |
| Lean mass indexed for squared height (kg/m <sup>2</sup> )      | 5255                         | 5566                        | 5.6              |
| Total fat mass (kg)                                            | 5304                         | 5566                        | 4.7              |
| Total fat mass indexed for squared height (kg/m <sup>2</sup> ) | 5255                         | 5566                        | 5.6              |
| Trunk fat mass (kg)                                            | 5304                         | 5566                        | 4.7              |
| Trunk fat mass indexed for squared height (kg/m <sup>2</sup> ) | 5255                         | 5566                        | 5.6              |
| <b><i>Metabolic profile</i></b>                                |                              |                             |                  |
| High-density lipoprotein (mmol/L)                              | 3769                         | 5566                        | 32.3             |
| Low-density lipoprotein (mmol/L)                               | 3769                         | 5566                        | 32.3             |
| Triglyceride (mmol/L)                                          | 3769                         | 5566                        | 32.3             |
| Adiponectin (µg/ml)                                            | 3767                         | 5566                        | 32.3             |
| <b><i>Fitness measure</i></b>                                  |                              |                             |                  |
| CRF (W)                                                        | 2813                         | 5566                        | 49.5             |
| CRF/BM (W·kg BM <sup>-1</sup> )                                | 2810                         | 5566                        | 49.5             |
| CRF/BM <sup>-0.21</sup> (W·kg BM <sup>-0.21</sup> )            | 2810                         | 5566                        | 49.5             |
| CRF/LM <sup>-0.54</sup> (W·kg LM <sup>-0.54</sup> )            | 2683                         | 5566                        | 51.8             |
| <b><i>Vascular measure</i></b>                                 |                              |                             |                  |
| Pulse rate (beats/mins)                                        | 5512                         | 5566                        | 1.0              |
| Systolic blood pressure (mmHg)                                 | 5511                         | 5566                        | 1.0              |
| Diastolic blood pressure (mmHg)                                | 5512                         | 5566                        | 1.0              |

aPHV, age at peak height velocity; BM, body mass; CRF, cardiorespiratory fitness; LM, lean mass; W, watt.
