# Supplementary material for: Cardiorespiratory Fitness, Fat Mass, and Cardiometabolic Health with Endothelial Function, Arterial Elasticity, and Stiffness
Source: PubMed Central journal article supplement — Med Sci Sports Exerc. 2021 Aug 16;54(1):141–52. doi: 10.1249/MSS.0000000000002757 (PMC8677603; doi:10.1249/mss.0000000000002757), 2021-08-16
Supplement: msse-54-141-s004.pdf [file msse-54-141-s004.pdf]

**Table SDC 3** Variables used in multivariable multiple imputation model.

| Variable                                                       | Missing values imputed in this variable | Imputed values |         | Rounding | (n) imputed |
|----------------------------------------------------------------|-----------------------------------------|----------------|---------|----------|-------------|
|                                                                |                                         | Minimum        | Maximum |          |             |
| Age (years)                                                    | NA, no missing                          |                |         | Integer  |             |
| Sex                                                            | NA, no missing                          |                |         |          |             |
| Somatic maturation (puberty) by time to aPHV (%)               | Yes                                     | 1              | 2       |          | 1363        |
| Social-economic status based on Mother's occupation            | Yes                                     | 1              | 6       |          | 3057        |
| <b><i>Anthropometry and Fat measure</i></b>                    |                                         |                |         |          |             |
| Body height (m)                                                | Yes                                     | 1.18           | 1.65    |          | 56          |
| Weight (kg)                                                    | Yes                                     | 19.4           | 74.4    |          | 11          |
| Lean mass (kg)                                                 | Yes                                     | 15.64          | 42.70   |          | 262         |
| Lean mass indexed for squared height (kg/m <sup>2</sup> )      | Yes                                     | 9.74           | 16.95   |          | 311         |
| Total fat mass (kg)                                            | Yes                                     | 1.27           | 36.03   |          | 262         |
| Total fat mass indexed for squared height (kg/m <sup>2</sup> ) | Yes                                     | 0.69           | 18.15   |          | 311         |
| Trunk fat mass (kg)                                            | Yes                                     | 0.38           | 16.52   |          | 262         |
| Trunk fat mass indexed for squared height (kg/m <sup>2</sup> ) | Yes                                     | 0.20           | 8.28    |          | 311         |
| <b><i>Metabolic profile</i></b>                                |                                         |                |         |          |             |
| High-density lipoprotein (mmol/L)                              | Yes                                     | 0.44           | 2.88    |          | 1797        |
| Low-density lipoprotein (mmol/L)                               | Yes                                     | -0.06          | 9.86    |          | 1797        |
| Triglyceride (mmol/L)                                          | Yes                                     | 0.18           | 8.91    |          | 1797        |
| Adiponectin (µg/ml)                                            | Yes                                     | 0.18           | 43.06   |          | 1799        |
| <b><i>Fitness measure</i></b>                                  |                                         |                |         |          |             |
| CRF (W)                                                        | Yes                                     | 35.83          | 87.80   |          | 2753        |
| CRF/BM (W·kg BM <sup>-1</sup> )                                | Yes                                     | 0.83           | 3.21    |          | 2756        |
| CRF/BM <sup>-0.21</sup> (W·kg BM <sup>-0.21</sup> )            | Yes                                     | 17.20          | 41.70   |          | 2756        |
| CRF/LM <sup>-0.54</sup> (W·kg LM <sup>-0.54</sup> )            | Yes                                     | 6.82           | 15.60   |          | 2883        |
| <b><i>Vascular measure</i></b>                                 |                                         |                |         |          |             |
| Pulse rate (beats/mins)                                        | Yes                                     | 47.00          | 135.00  |          | 54          |
| Systolic blood pressure (mmHg)                                 | Yes                                     | 65.50          | 144.50  |          | 55          |
| Diastolic blood pressure (mmHg)                                | Yes                                     | 37.00          | 81.50   |          | 54          |
| Brachial artery diameter (mm)                                  | NA, no missing                          |                |         |          |             |
| Flow-mediated dilation (%)                                     | NA, no missing                          |                |         |          |             |
| Flow-mediated dilation absolute (mm)                           | NA, no missing                          |                |         |          |             |
| Carotid-radial PWV (m/s)                                       | NA, no missing                          |                |         |          |             |
| Distensibility coefficient (% per mmHg)                        | NA, no missing                          |                |         |          |             |

NA, not applicable

aPHV, age at peak height velocity; BM, body mass; CRF, cardiorespiratory fitness; LM, lean mass; PWV, pulse wave velocity; W, watt
