# Supplementary material for: Cardiorespiratory Fitness, Fat Mass, and Cardiometabolic Health with Endothelial Function, Arterial Elasticity, and Stiffness
Source: PubMed Central journal article supplement — Med Sci Sports Exerc. 2021 Aug 16;54(1):141–52. doi: 10.1249/MSS.0000000000002757 (PMC8677603; doi:10.1249/mss.0000000000002757), 2021-08-16
Supplement: msse-54-141-s005.pdf [file msse-54-141-s005.pdf]

**Table SDC 4** Characteristics of cohort participants (imputed data)

| Variable                                                          | Observed data set<br>Mean/SD | Imputed data set<br>Mean/SD |
|-------------------------------------------------------------------|------------------------------|-----------------------------|
| Somatic maturation (puberty) by time to aPHV (%)                  | 0.5                          | 0.4                         |
| <b><i>Social-economic status based on Mother's occupation</i></b> |                              |                             |
| I – Professional (%)                                              | 5.1                          | 5.3                         |
| II - Managerial and Technical (%)                                 | 36.3                         | 35.7                        |
| IIIa - Skilled non-manual (%)                                     | 39.1                         | 38.6                        |
| IIIb - Skilled manual (%)                                         | 1.7                          | 2.1                         |
| IV - Partly skilled (%)                                           | 14.7                         | 14.9                        |
| V - Unskilled (%)                                                 | 3.1                          | 3.2                         |
| <b><i>Anthropometry and Fat measure</i></b>                       |                              |                             |
| Body height (m)                                                   | 1.40 (0.06)                  | 1.40 (0.06)                 |
| *Weight (kg)                                                      | 33.0 (8.6)                   | 33.0 (8.6)                  |
| Lean mass (kg)                                                    | 24.52 (3.19)                 | 24.51 (3.19)                |
| Lean mass indexed for squared height (kg/m <sup>2</sup> )         | 12.56 (0.99)                 | 12.56 (0.99)                |
| *Total fat mass (kg)                                              | 7.14 (6.06)                  | 7.14 (6.06)                 |
| *Total fat mass indexed for squared height (kg/m <sup>2</sup> )   | 3.67 (2.94)                  | 3.67 (2.94)                 |
| *Trunk fat mass (kg)                                              | 2.65 (2.68)                  | 2.65 (2.68)                 |
| *Trunk fat mass indexed for squared height (kg/m <sup>2</sup> )   | 1.37 (1.34)                  | 1.37 (1.34)                 |
| <b><i>Metabolic profile</i></b>                                   |                              |                             |
| High-density lipoprotein (mmol/L)                                 | 1.40 (0.31)                  | 1.40 (0.31)                 |
| Low-density lipoprotein (mmol/L)                                  | 2.35 (0.60)                  | 2.36 (0.60)                 |
| *Triglyceride (mmol/L)                                            | 1.00 (0.60)                  | 1.00 (0.60)                 |
| *Adiponectin (µg/ml)                                              | 12.35 (7.02)                 | 12.35 (7.02)                |
| <b><i>Fitness measure</i></b>                                     |                              |                             |
| CRF (W)                                                           | 63.92 (9.07)                 | 63.97 (9.07)                |
| CRF/BM (W·kg BM <sup>-1</sup> )                                   | 1.92 (0.38)                  | 1.92 (0.38)                 |
| CRF/BM <sup>-0.21</sup> (W·kg BM <sup>-0.21</sup> )               | 31.31 (4.31)                 | 31.30 (4.31)                |
| CRF/LM <sup>-0.54</sup> (W·kg LM <sup>-0.54</sup> )               | 11.51 (1.46)                 | 11.47 (1.46)                |
| <b><i>Vascular measure</i></b>                                    |                              |                             |
| Pulse rate (beats/mins)                                           | 79 (11)                      | 79 (11)                     |
| Systolic blood pressure (mmHg)                                    | 103 (9)                      | 103 (9)                     |
| Diastolic blood pressure (mmHg)                                   | 57 (6)                       | 57 (6)                      |

The values are means (standard deviations) and \*median (interquartile range) except for maturation status and social-economic status in percentage.

aPHV, age at peak height velocity; BM, body mass; CRF, cardiorespiratory fitness; LM, lean mass; W, watt
