# Supplementary material for: Cardiorespiratory Fitness, Fat Mass, and Cardiometabolic Health with Endothelial Function, Arterial Elasticity, and Stiffness
Source: PubMed Central journal article supplement — Med Sci Sports Exerc. 2021 Aug 16;54(1):141–52. doi: 10.1249/MSS.0000000000002757 (PMC8677603; doi:10.1249/mss.0000000000002757), 2021-08-16
Supplement: msse-54-141-s006.pdf [file msse-54-141-s006.pdf]

**Table SDC 5** Associations of cardiorespiratory fitness, fat mass, lean mass and adiponectin with endothelial function, arterial elasticity, and arterial stiffness with different adjustments for observed (non-imputed) data

| Variable                                                 | n    | Model 1                    |                   | Model 2                   |                   | Model 3                   |                   | Model 4                   |                   | Model 5                   |                   |
|----------------------------------------------------------|------|----------------------------|-------------------|---------------------------|-------------------|---------------------------|-------------------|---------------------------|-------------------|---------------------------|-------------------|
|                                                          |      | $\beta$ (95% CI)           | P-value           | $\beta$ (95% CI)          | P-value           | $\beta$ (95% CI)          | P-value           | $\beta$ (95% CI)          | P-value           | $\beta$ (95% CI)          | P-value           |
| <b>Flow-mediated dilation (%) n= 5566</b>                |      |                            |                   |                           |                   |                           |                   |                           |                   |                           |                   |
| CRF (W)                                                  | 2813 | -0.016 (-0.031 to -0.002)  | <b>0.027</b>      | -0.015 (-0.030 to 0.000)  | 0.053             | -0.003 (-0.019 to 0.014)  | 0.758             | -0.002 (-0.018 to 0.014)  | 0.825             | -0.020 (-0.049 to 0.010)  | 0.192             |
| CRF/BM <sup>0.21</sup> (W·kg BM <sup>-0.21</sup> )       | 2810 | -0.025 (-0.055 to 0.006)   | 0.119             | -0.026 (-0.058 to 0.005)  | 0.102             | -0.010 (-0.042 to 0.022)  | 0.551             | -0.005 (-0.040 to 0.029)  | 0.763             | -0.041 (-0.104 to 0.022)  | 0.202             |
| CRF/LM <sup>0.54</sup> (W·kg LM <sup>-0.54</sup> )       | 2683 | -0.016 (-0.106 to 0.074)   | 0.724             | -0.020 (-0.110 to 0.070)  | 0.668             | -0.015 (-0.104 to 0.075)  | 0.751             | -0.009 (-0.106 to 0.089)  | 0.858             | -0.098 (-0.278 to 0.082)  | 0.285             |
| *Adiponectin ( $\mu\text{g/ml}$ )                        | 3767 | -0.077 (-0.324 to 0.169)   | 0.539             | -0.067 (-0.318 to 0.184)  | 0.600             | -0.147 (-0.400 to 0.107)  | 0.257             | -0.255 (-0.535 to 0.024)  | 0.074             | -0.304 (-0.705 to 0.097)  | 0.137             |
| *Total fat mass (kg)                                     | 5304 | -0.042 (-0.207 to 0.123)   | 0.616             | -0.146 (-0.388 to 0.096)  | 0.237             | 0.182 (-0.010 to 0.374)   | 0.063             | 0.539 (0.258 to 0.821)    | <b>&lt;0.0001</b> | 0.731 (0.159 to 1.303)    | <b>0.012</b>      |
| *Trunk fat mass (kg)                                     | 5304 | 0.005 (-0.135 to 0.145)    | 0.943             | -0.073 (-0.279 to 0.132)  | 0.482             | 0.197 (0.036 to 0.358)    | <b>0.016</b>      | 0.522 (0.284 to 0.761)    | <b>&lt;0.0001</b> | 0.759 (0.265 to 1.252)    | <b>0.003</b>      |
| Lean mass (kg)                                           | 5304 | -0.063 (-0.093 to -0.033)  | <b>&lt;0.0001</b> | -0.080 (-0.115 to -0.045) | <b>&lt;0.0001</b> | -0.109 (-0.159 to -0.060) | <b>&lt;0.0001</b> | 0.046 (0.005 to 0.088)    | <b>0.029</b>      | 0.050 (-0.027 to 0.127)   | 0.204             |
| <b>*Distensibility co-efficient (% per mmHg) n= 5566</b> |      |                            |                   |                           |                   |                           |                   |                           |                   |                           |                   |
| CRF (W)                                                  | 2813 | 0.002 (<0.0001 to 0.004)   | <b>0.017</b>      | 0.002 (<0.0001 to 0.004)  | <b>0.045</b>      | 0.003 (0.001 to 0.005)    | <b>0.009</b>      | 0.003 (<0.0001 to 0.005)  | <b>0.034</b>      | 0.003 (-0.001 to 0.008)   | 0.107             |
| CRF/BM <sup>0.21</sup> (W·kg BM <sup>-0.21</sup> )       | 2810 | 0.006 (0.002 to 0.010)     | <b>0.008</b>      | 0.005 (<0.0001 to 0.009)  | <b>0.036</b>      | 0.006 (0.001 to 0.010)    | <b>0.011</b>      | 0.005 (<0.0001 to 0.010)  | 0.050             | 0.006 (-0.003 to 0.015)   | 0.174             |
| CRF/LM <sup>0.54</sup> (W·kg LM <sup>-0.54</sup> )       | 2683 | 0.017 (0.004 to 0.029)     | <b>0.009</b>      | 0.016 (0.004 to 0.029)    | <b>0.011</b>      | 0.017 (0.004 to 0.029)    | <b>0.009</b>      | 0.014 (<0.0001 to 0.028)  | 0.055             | 0.015 (-0.010 to 0.041)   | 0.240             |
| *Adiponectin ( $\mu\text{g/ml}$ )                        | 3767 | -0.007 (-0.041 to 0.027)   | 0.670             | -0.005 (-0.040 to 0.029)  | 0.766             | <0.0001 (-0.036 to 0.035) | 0.979             | -0.002 (-0.042 to 0.038)  | 0.917             | 0.032 (-0.025 to 0.089)   | 0.267             |
| *Total fat mass (kg)                                     | 5304 | 0.015 (-0.008 to 0.037)    | 0.212             | -0.013 (-0.047 to 0.021)  | 0.449             | 0.008 (-0.019 to 0.034)   | 0.576             | 0.009 (-0.031 to 0.049)   | 0.662             | -0.022 (-0.103 to 0.059)  | 0.590             |
| *Trunk fat mass (kg)                                     | 5304 | 0.015 (-0.005 to 0.034)    | 0.142             | -0.007 (-0.035 to 0.022)  | 0.649             | 0.009 (-0.013 to 0.032)   | 0.403             | 0.010 (-0.024 to 0.044)   | 0.559             | -0.019 (-0.089 to 0.051)  | 0.590             |
| Lean mass (kg)                                           | 5304 | 0.003 (-0.001 to 0.007)    | 0.132             | 0.002 (-0.002 to 0.007)   | 0.313             | -0.007 (-0.011 to 0.003)  | 0.215             | 0.008 (0.002 to 0.013)    | <b>0.012</b>      | 0.008 (-0.002 to 0.019)   | 0.130             |
| <b>Pulse wave velocity carotid-radial (m/s) n= 5566</b>  |      |                            |                   |                           |                   |                           |                   |                           |                   |                           |                   |
| CRF (W)                                                  | 2813 | -0.010 (-0.015 to -0.005)  | <b>&lt;0.0001</b> | -0.007 (-0.012 to -0.002) | <b>0.009</b>      | -0.004 (-0.013 to -0.001) | 0.015             | -0.004 (-0.010 to 0.002)  | 0.155             | -0.007 (-0.017 to -0.003) | 0.162             |
| CRF/BM <sup>0.21</sup> (W·kg BM <sup>-0.21</sup> )       | 2810 | -0.011 (-0.022 to -0.0001) | <b>0.046</b>      | -0.016 (-0.027 to -0.005) | <b>0.006</b>      | -0.007 (-0.019 to 0.005)  | 0.238             | -0.010 (-0.023 to 0.002)  | 0.108             | -0.017 (-0.038 to 0.005)  | 0.127             |
| CRF/LM <sup>0.45</sup> (W·kg LM <sup>-0.54</sup> )       | 2683 | -0.040 (-0.073 to -0.008)  | <b>0.014</b>      | -0.049 (-0.081 to -0.017) | <b>0.003</b>      | -0.040 (-0.072 to -0.008) | <b>0.015</b>      | -0.038 (-0.074 to -0.003) | <b>0.035</b>      | -0.059 (-0.120 to 0.003)  | 0.061             |
| *Adiponectin ( $\mu\text{g/ml}$ )                        | 3767 | 0.115 (0.025 to 0.206)     | <b>0.012</b>      | 0.089 (-0.003 to 0.180)   | 0.057             | 0.089 (-0.004 to 0.183)   | 0.060             | 0.067 (-0.037 to 0.171)   | 0.067             | 0.086 (-0.062 to 0.233)   | 0.254             |
| *Total fat mass (kg)                                     | 5304 | -0.380 (-0.440 to -0.320)  | <b>&lt;0.0001</b> | -0.347 (-0.433 to -0.262) | <b>&lt;0.0001</b> | -0.357 (-0.427 to -0.288) | <b>&lt;0.0001</b> | -0.272 (-0.374 to -0.170) | <b>&lt;0.0001</b> | -0.394 (-0.589 to -0.199) | <b>&lt;0.0001</b> |
| *Trunk fat mass (kg)                                     | 5304 | -0.319 (-0.370 to -0.268)  | <b>&lt;0.0001</b> | -0.292 (-0.365 to -0.219) | <b>&lt;0.0001</b> | -0.295 (-0.354 to -0.237) | <b>&lt;0.0001</b> | -0.228 (-0.315 to -0.141) | <b>&lt;0.0001</b> | -0.336 (-0.504 to -0.167) | <b>&lt;0.0001</b> |
| Lean mass (kg)                                           | 5304 | -0.041 (-0.052 to -0.030)  | <b>&lt;0.0001</b> | -0.008 (-0.021 to 0.005)  | 0.206             | -0.032 (-0.050 to -0.014) | <b>0.001</b>      | 0.011 (-0.004 to 0.027)   | 0.153             | 0.025 (-0.003 to 0.053)   | 0.077             |

BM, body mass; CI, confidence interval; CRF, cardiorespiratory fitness; LM, lean mass; W, watt. The regression coefficient ( $\beta$ ) quantifies the association between dependent and independent variables. A 2-sided P-value <0.05 was considered statistically significant and is bolded.

\*Logarithm transformation of skewed variables were used in analyses.

Model 1: Adjusted for age and sex.

Model 2: Adjusted for age, sex and total fat mass or cardiorespiratory per lean mass when predictor variable is total fat mass.

Model 3: Adjusted for age, sex, lean mass or cardiorespiratory fitness per lean mass when predictor variable is lean mass.

Model 4: Additional adjustment of Model 2 for puberty and brachial artery diameter

Model 5: Additional adjustment of Model 4 for low-density lipoprotein, systolic blood pressure, maternal socio-economic status and time (years) between predictor and outcome measurement
