# Supplementary material for: Cardiorespiratory Fitness, Fat Mass, and Cardiometabolic Health with Endothelial Function, Arterial Elasticity, and Stiffness
Source: PubMed Central journal article supplement — Med Sci Sports Exerc. 2021 Aug 16;54(1):141–52. doi: 10.1249/MSS.0000000000002757 (PMC8677603; doi:10.1249/mss.0000000000002757), 2021-08-16
Supplement: msse-54-141-s008.pdf [file msse-54-141-s008.pdf]

**Table SDC 7** Associations of cardiorespiratory fitness, fat mass, lean mass and adiponectin categories with endothelial function, arterial elasticity, and arterial stiffness for observed (non-

| Variable                                                                      | Flow-mediated dilation (%)<br>(n=5566) |              | *,†Distensibility co-efficient (% per mmHg) (n=5566) |              | Carotid-radial pulse wave velocity (m/s) (n=5566) |              |
|-------------------------------------------------------------------------------|----------------------------------------|--------------|------------------------------------------------------|--------------|---------------------------------------------------|--------------|
|                                                                               | Estimated marginal means<br>(95% CI)   | P-value      | Estimated marginal means<br>(95% CI)                 | P-value      | Estimated marginal means<br>(95% CI)              | P-value      |
| <b>CRF/BM<sup>-0.21</sup> (W·kg BM<sup>-0.21</sup>) (n=2810)</b>              |                                        |              |                                                      |              |                                                   |              |
| Low category                                                                  | 8.51 (8.06 to 8.97)                    | 0.291        | 10.93 (10.20 to 11.68)                               | 0.130        | 7.59 (7.44 to 7.75)                               | 0.540        |
| Moderate category                                                             | 8.20 (7.77 to 8.64)                    |              | 10.80 (10.08 to 11.68)                               |              | 7.57 (7.42 to 7.72)                               |              |
| High category                                                                 | 7.98 (7.53 to 8.44)                    |              | 11.94 (11.05 to 12.74)                               |              | 7.47 (7.32 to 7.63)                               |              |
| <b>CRF/LM<sup>-0.54</sup> (W·kg LM<sup>-0.54</sup>) (n=2683)</b>              |                                        |              |                                                      |              |                                                   |              |
| Low category                                                                  | 8.56 (8.12 to 9.00)                    | 0.151        | 11.05 (10.32 to 11.81)                               | 0.318        | 7.61 (7.47 to 7.76)                               | 0.400        |
| Moderate category                                                             | 7.94 (7.50 to 8.38)                    |              | 10.93 (10.20 to 11.68)                               |              | 7.57 (7.42 to 7.72)                               |              |
| High category                                                                 | 8.18 (7.73 to 8.63)                    |              | 11.81 (10.93 to 12.60)                               |              | 7.46 (7.31 to 7.61)                               |              |
| <b>*Adiponectin (µg/ml) (n=3767)</b>                                          |                                        |              |                                                      |              |                                                   |              |
| Low category                                                                  | 8.20 (7.89 to 8.50)                    | 0.236        | 11.05 (10.56 to 11.68)                               | 0.567        | 7.53 (7.42 to 7.65)                               | 0.738        |
| Moderate category                                                             | 8.14 (7.84 to 8.44)                    |              | 11.05 (10.56 to 11.68)                               |              | 7.56 (7.45 to 7.67)                               |              |
| High category                                                                 | 7.85 (7.54 to 8.15)                    |              | 11.43 (10.93 to 12.07)                               |              | 7.60 (7.49 to 7.71)                               |              |
| <b>*Total fat mass indexed for squared height (kg/m<sup>2</sup>) (n=5255)</b> |                                        |              |                                                      |              |                                                   |              |
| Low category                                                                  | 7.53 (6.96 to 8.11)                    | <b>0.022</b> | 11.94 (10.93 to 13.01)                               | 0.115        | 7.83 (7.63 to 8.03)                               | <b>0.003</b> |
| Moderate category                                                             | 8.48 (8.13 to 8.82)                    |              | 10.80 (10.20 to 11.43)                               |              | 7.54 (7.42 to 7.66)                               |              |
| High category                                                                 | 8.43 (7.85 to 9.01)                    |              | 11.55 (10.55 to 12.74)                               |              | 7.30 (7.10 to 7.50)                               |              |
| <b>*Trunk fat mass indexed for squared height (kg/m<sup>2</sup>) (n=5255)</b> |                                        |              |                                                      |              |                                                   |              |
| Low category                                                                  | 7.56 (6.70 to 8.12)                    | <b>0.024</b> | 11.55 (16.91 to 12.60)                               | 0.680        | 7.84 (7.65 to 8.04)                               | <b>0.001</b> |
| Moderate category                                                             | 8.42 (8.08 to 8.77)                    |              | 11.05 (10.44 to 11.68)                               |              | 7.54 (7.42 to 7.65)                               |              |
| High category                                                                 | 8.59 (7.99 to 9.19)                    |              | 10.80 (10.32 to 11.05)                               |              | 7.27 (7.06 to 7.47)                               |              |
| <b>Lean mass indexed for squared height (kg/m<sup>2</sup>) (n=5255)</b>       |                                        |              |                                                      |              |                                                   |              |
| Low category                                                                  | 7.96 (7.56 to 8.36)                    | 0.500        | 10.32 (9.74 to 11.05)                                | <b>0.005</b> | 7.71 (7.56 to 7.85)                               | <b>0.042</b> |
| Moderate category                                                             | 8.01 (7.77 to 8.26)                    |              | 11.17 (10.80 to 11.68)                               |              | 7.58 (7.49 to 7.67)                               |              |
| High category                                                                 | 8.27 (7.89 to 8.66)                    |              | 12.20 (11.43 to 12.87)                               |              | 7.42 (7.28 to 7.56)                               |              |

imputed) data set

BM, body mass; CI, confidence interval; CRF, cardiorespiratory fitness; LM, lean mass; W, watt. P-value <0.05 were considered statistically significant and are bolded. Estimated marginal means were computed from general linear models of exposure categories in relation to outcome variables with Sidak correction. Associations were adjusted for age, sex, puberty, systolic blood pressure, mother's socio-economic status, total fat mass or cardiorespiratory fitness scaled by lean mass, low-density lipoprotein, diameter of the brachial artery and time between measures of exposure and outcome variable.

\*These variables were log-transformed by using natural log.

†This logged variable was back-transformed by exponentiation and presented as geometric mean
